# Supplementary material for: Investigating the mechanism of propylene epoxidation over halogen (X = F, Cl, Br, I) modified Cu2O(110) surfaces: a theoretical study
Source: Royal Society of Chemistry journal article supplement (doi:10.1039/d3cy01697h), 2024-01-01
Supplement: d3cy01697h1.pdf [file d3cy01697h1.pdf]

## Supporting information

### Investigating the Mechanism of Propylene Epoxidation over Halogen (X=F, Cl, Br, I) Modified Cu<sub>2</sub>O(110) Surfaces: A Theoretical Study

Lingyun Zhou,<sup>\*a</sup> Zhu Wen,<sup>a</sup> Leyuan Cui,<sup>b</sup> Guangxu Yang,<sup>a</sup> Yingchun Luo,<sup>a</sup> Yadian Xie,<sup>a</sup> Can Cui,<sup>a</sup> Chunyan Li,<sup>a</sup> Gang Fu,<sup>\*b</sup>

<sup>a</sup>School of Chemical Engineering, Key Laboratory of Low-Dimensional Materials and Big Data, Guizhou Minzu University, Guizhou Provincial Key Laboratory of Low Dimensional Materials and Environmental and Ecological Restorations, Guizhou, Guiyang 550025, China;

<sup>b</sup>State Key Laboratory of Physical Chemistry of Solid Surfaces, Department of Chemistry, College of Chemistry and Chemical Engineering, Xiamen University, Xiamen 361005, China.

\*Corresponding authors. E-mail: lyzhou@gzmu.edu.cn; gfu@xmu.edu.cn (G. Fu)

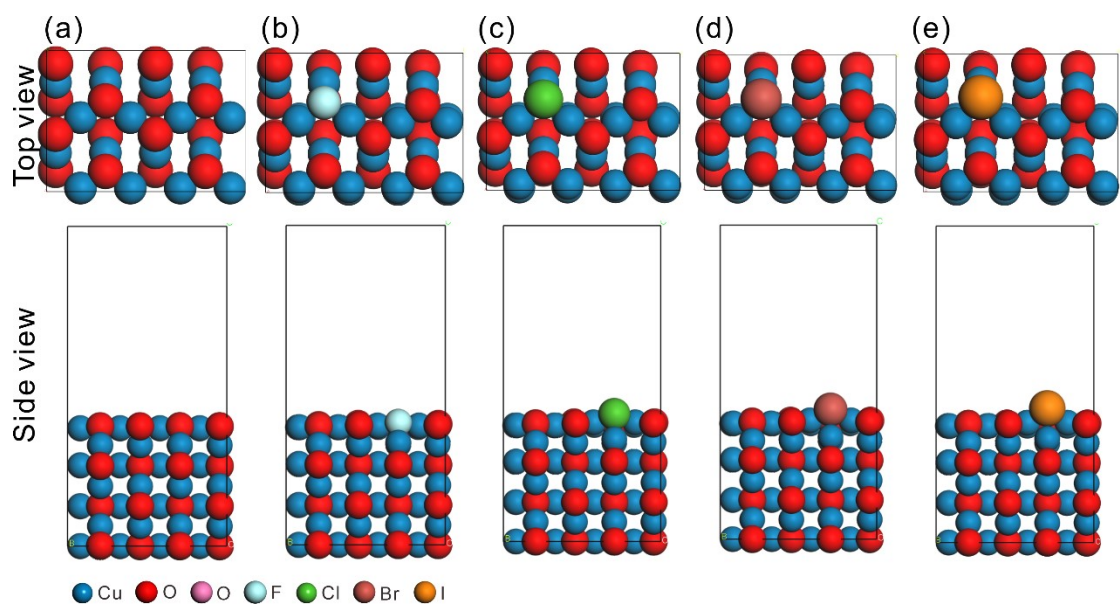

**Fig. S1.** The top view and side view of the computational models. (a)  $\text{Cu}_2\text{O}(110)$ , (b)  $\text{F-Cu}_2\text{O}(110)$ , (c)  $\text{Cl-Cu}_2\text{O}(110)$ , (d)  $\text{Br-Cu}_2\text{O}(110)$ , (e)  $\text{I-Cu}_2\text{O}(110)$ .

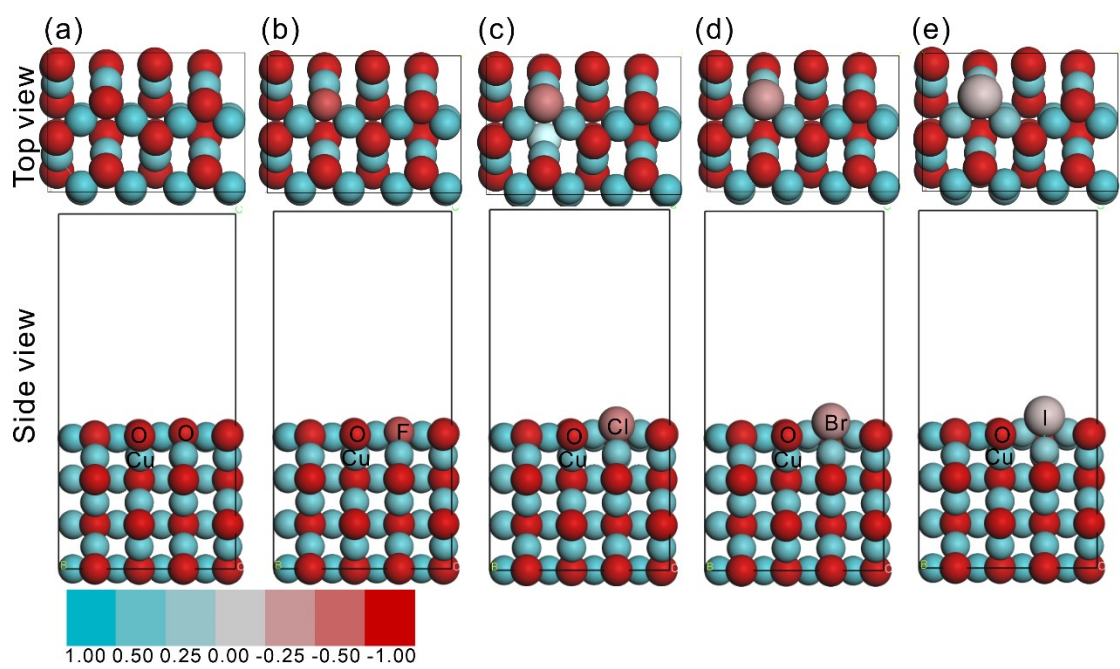

**Fig. S2.** Bader charge analysis of pristine Cu<sub>2</sub>O(110), F-Cu<sub>2</sub>O(110), Cl-Cu<sub>2</sub>O(110), Br-Cu<sub>2</sub>O(110) and I-Cu<sub>2</sub>O(110) surfaces. The color gradient indicated the magnitude of Bader charge.

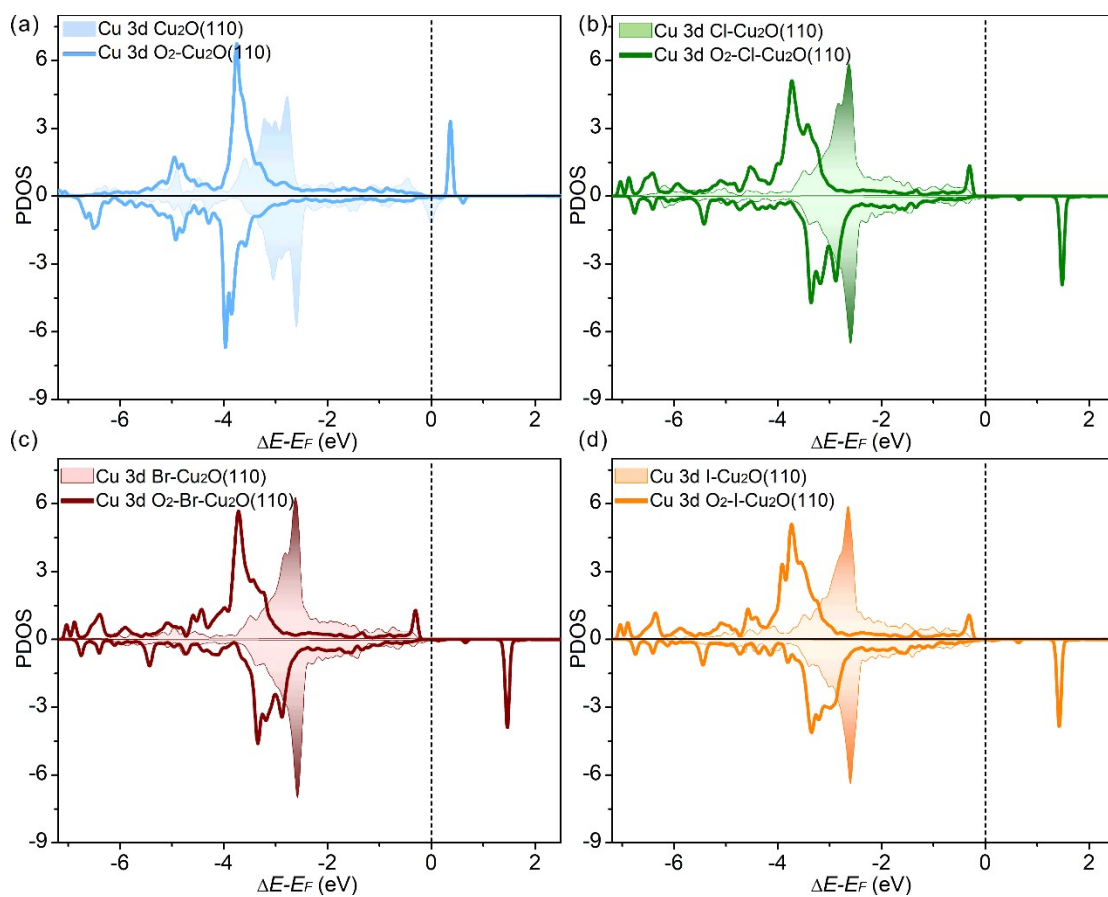

**Fig. S3.** The projected density of states (PDOS) of the 3d orbitals of surface Cu atoms directly coordinated with X before and after O<sub>2</sub> adsorption (a) Cu<sub>2</sub>O(110), (b) Cl-Cu<sub>2</sub>O(110), (c) Br-Cu<sub>2</sub>O(110) and (d) I-Cu<sub>2</sub>O(110)

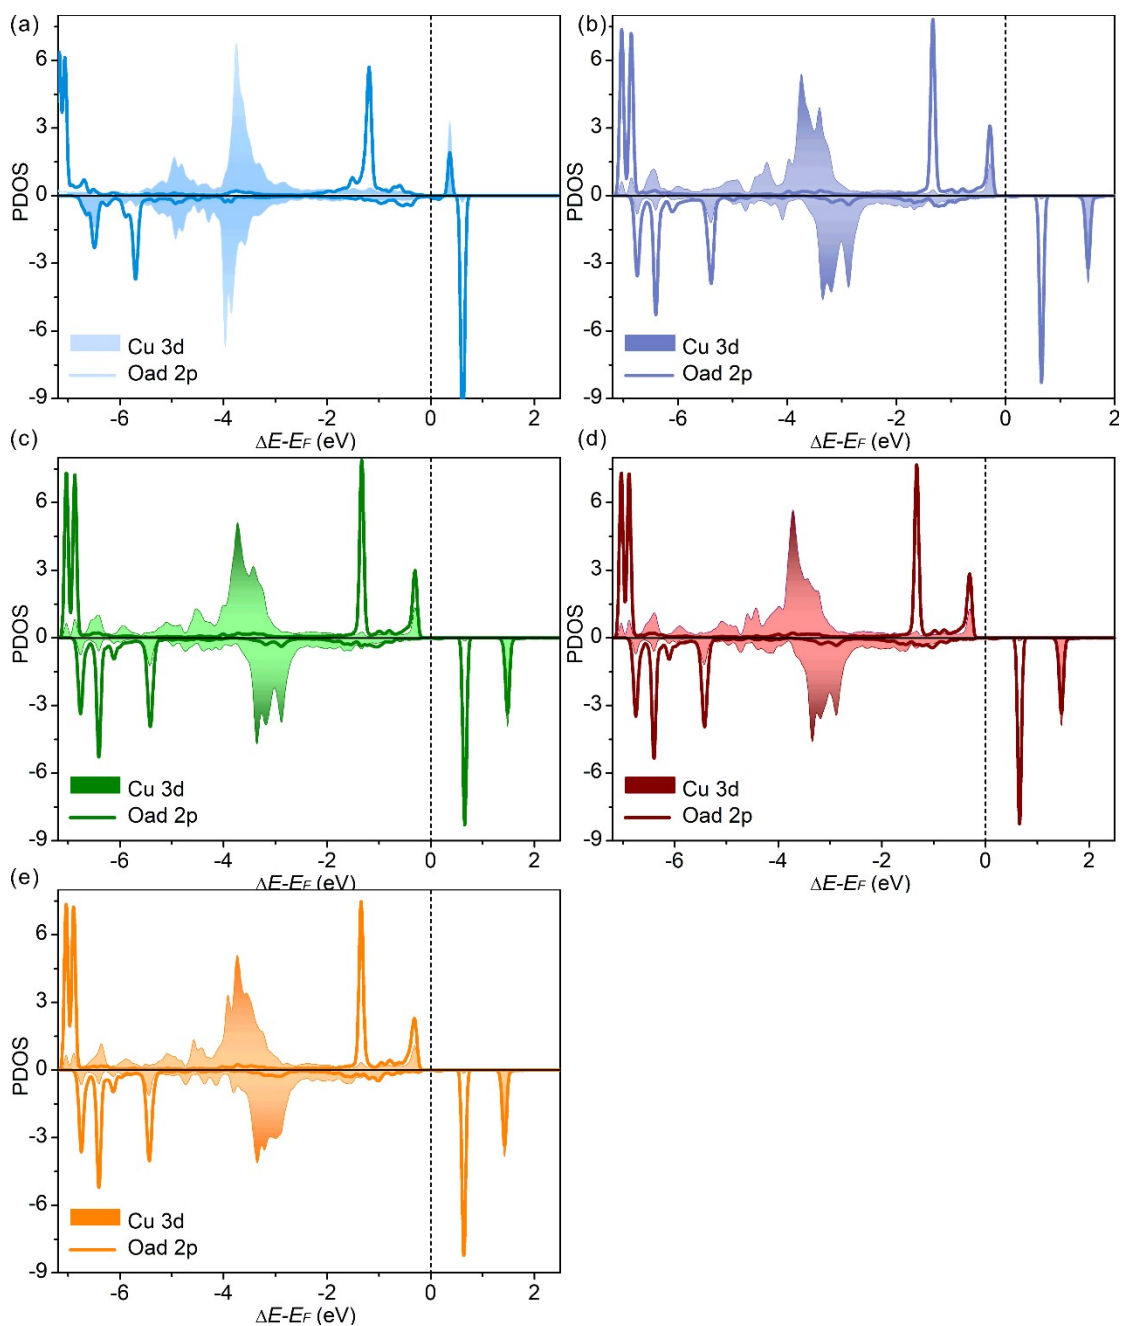

**Fig. S4.** The PDOS of the 3d orbitals of surface Cu atoms directly coordinated with X after O<sub>2</sub> adsorption and the 2p orbitals of the adsorbed O<sub>2</sub>, (a) Cu<sub>2</sub>O(110), (b) F-Cu<sub>2</sub>O(110), (c) Cl-Cu<sub>2</sub>O(110), (d) Br-Cu<sub>2</sub>O(110) and (e) I-Cu<sub>2</sub>O(110).

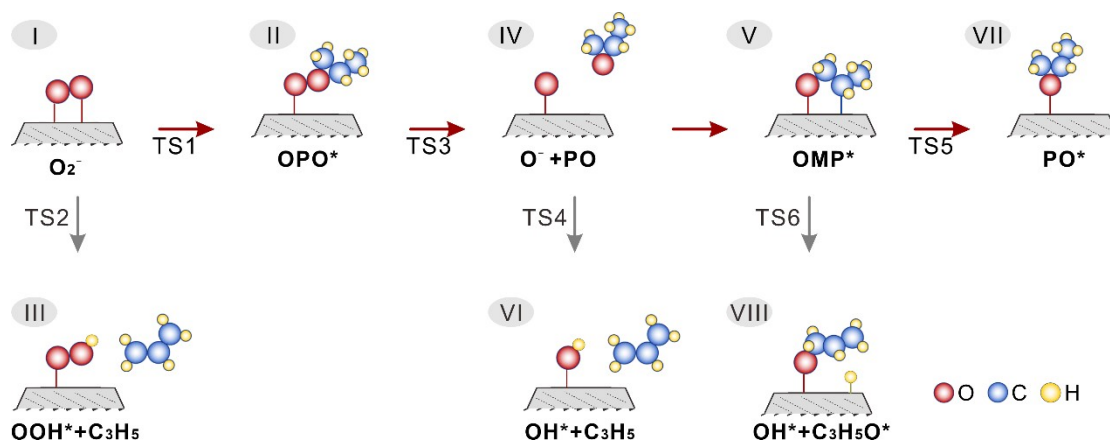

**Fig. S5.** Proposed reaction network of propylene oxidation by adsorbed  $O_2$ . (I) adsorbed  $O_2$ ; (II) peroxirane intermediate; (III) allyl intermediate; (IV) adsorbed O atom; (V) OMP\* intermediate; (VI) allyl intermediate; (VII) adsorbed  $PO^*$ ; (VIII) allylic oxygen intermediate; (TS1) oxygen insertion; (TS2)  $\alpha$ -H abstraction; (TS3) O-O bond cleavage; (TS4)  $\alpha$ -H abstraction; (TS5) ring closing; (TS6)  $\alpha$ -H abstraction.

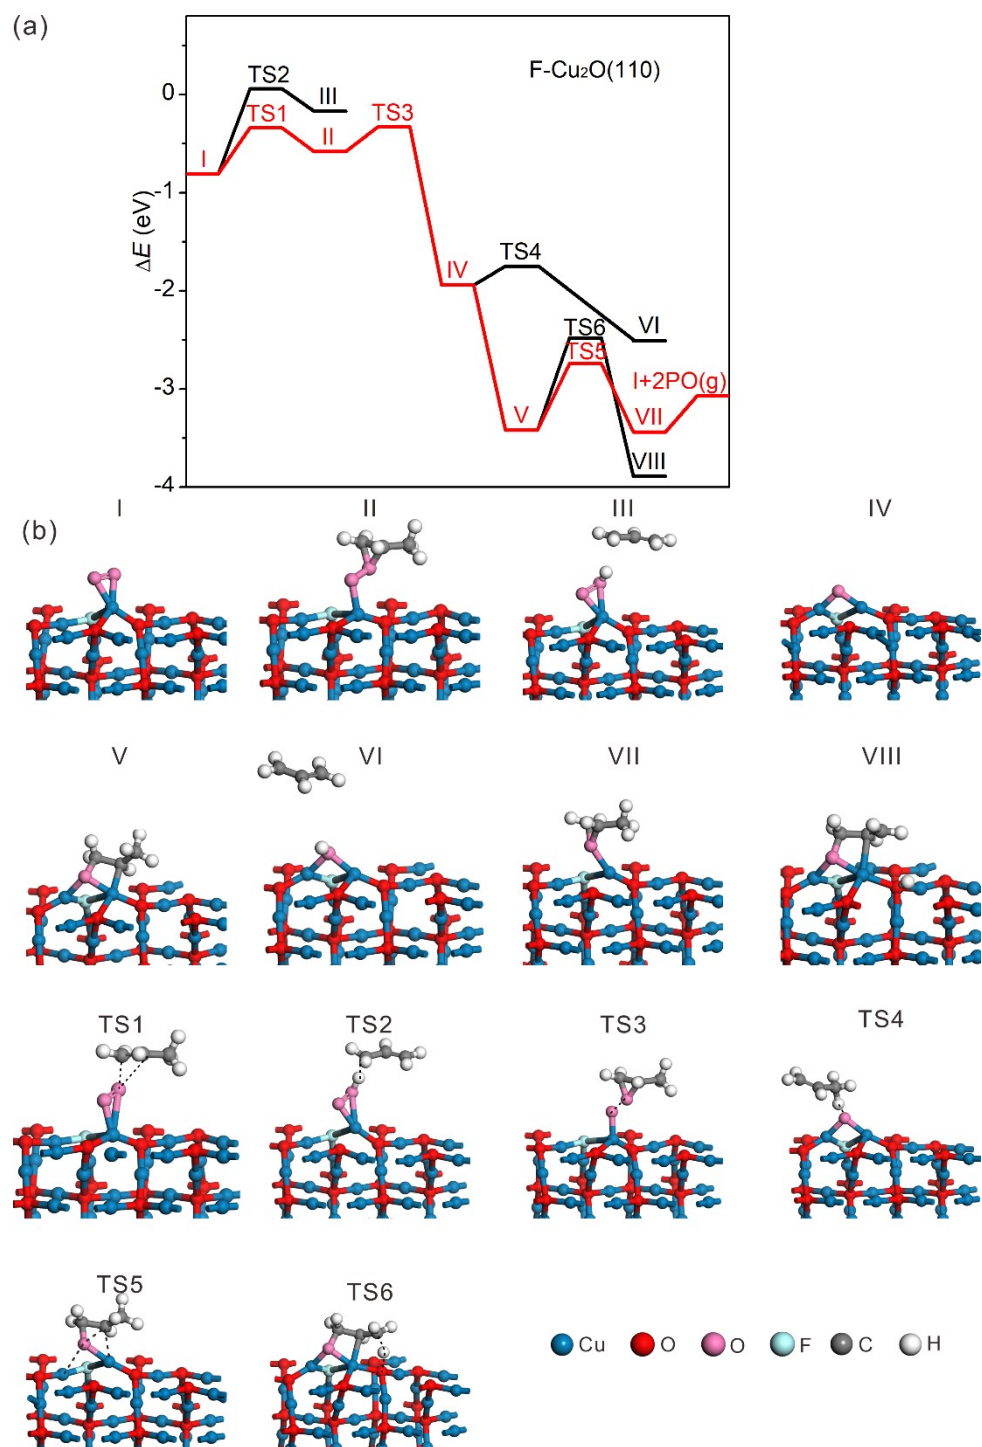

**Fig. S6.** The reaction of two propylene molecules with adsorbed  $O_2$  on F- $Cu_2O$  (110) surface: (a) potential energy profiles of propylene epoxidation from DFT; (b) optimized structures of intermediates and transition states involved in propylene epoxidation.

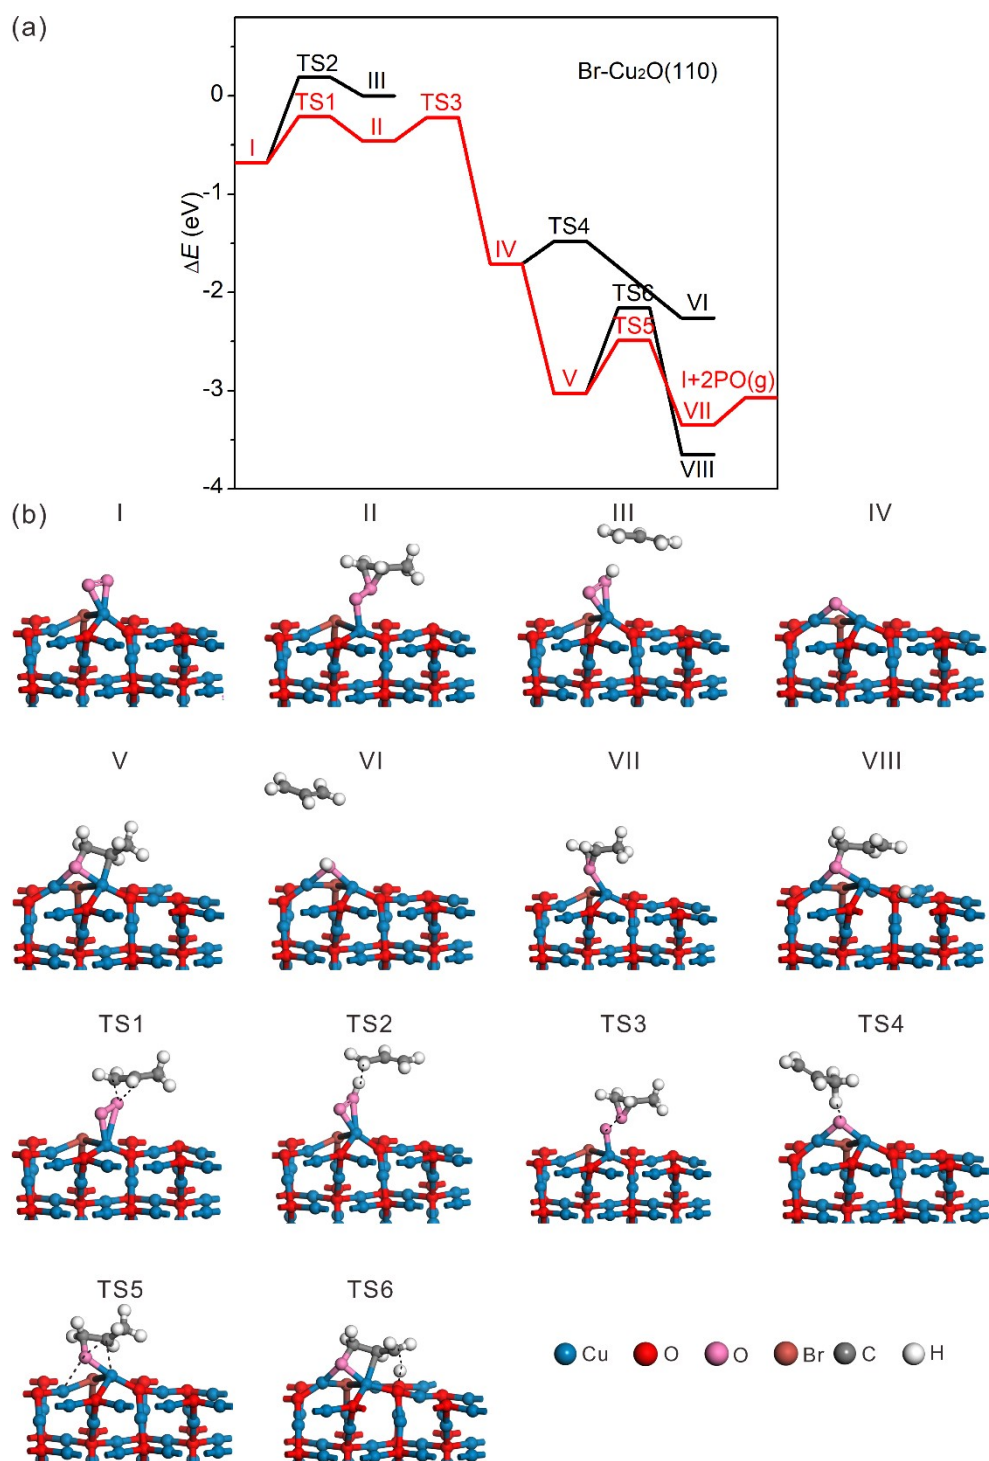

**Fig. S7.** The reaction of two propylene molecules with adsorbed O<sub>2</sub> on Br-Cu<sub>2</sub>O (110) surface: (a) potential energy profiles of propylene epoxidation from DFT; (b) optimized structures of intermediates and transition states involved in propylene epoxidation.



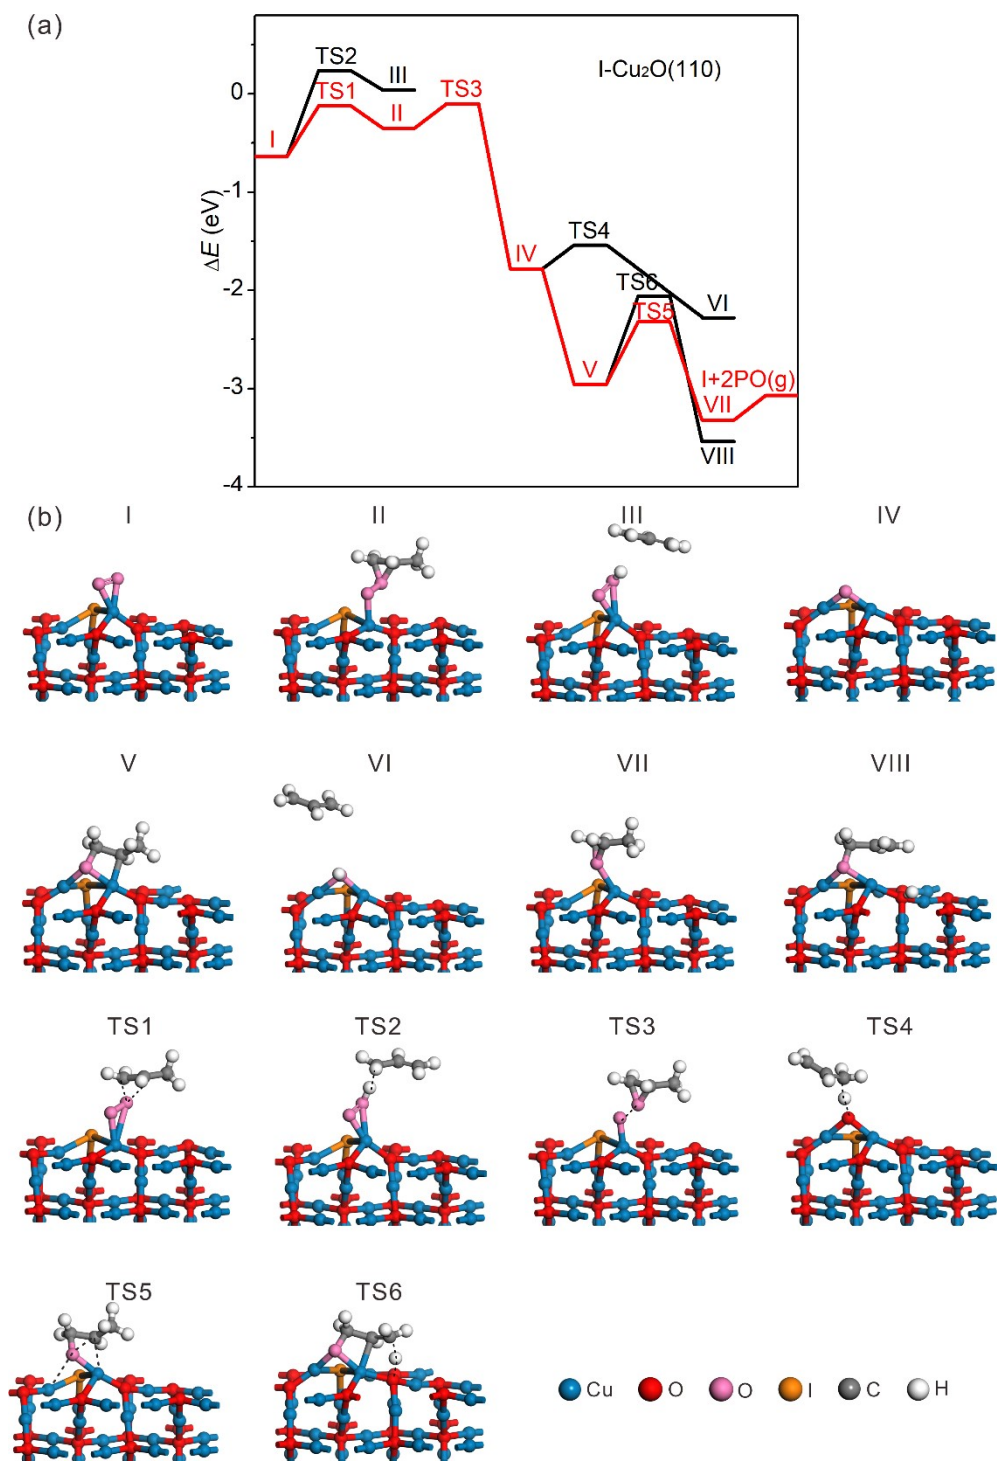

**Fig. S8.** The reaction of two propylene molecules with adsorbed  $O_2$  on I- $Cu_2O$  (110) surface: (a) potential energy profiles of propylene epoxidation from DFT; (b) optimized structures of intermediates and transition states involved in propylene epoxidation.

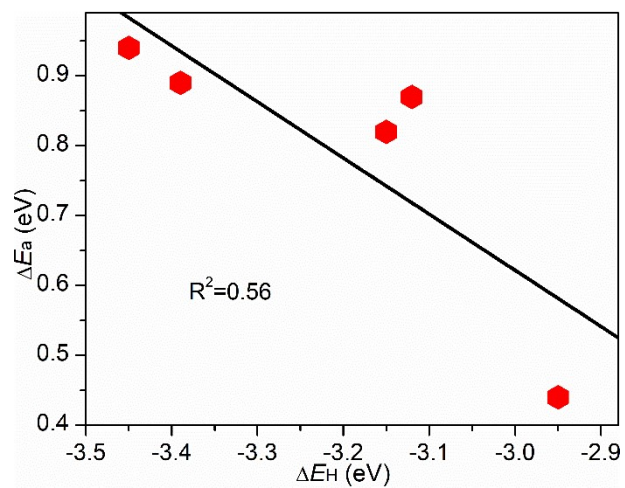

**Fig. S9.** The linear relationship between the hydrogen affinity ( $\Delta E_H$ ) of lattice oxygen species ( $O^{2-}$ ) and the energy barriers ( $\Delta E_a$ ) for the  $\alpha$ -H abstraction.

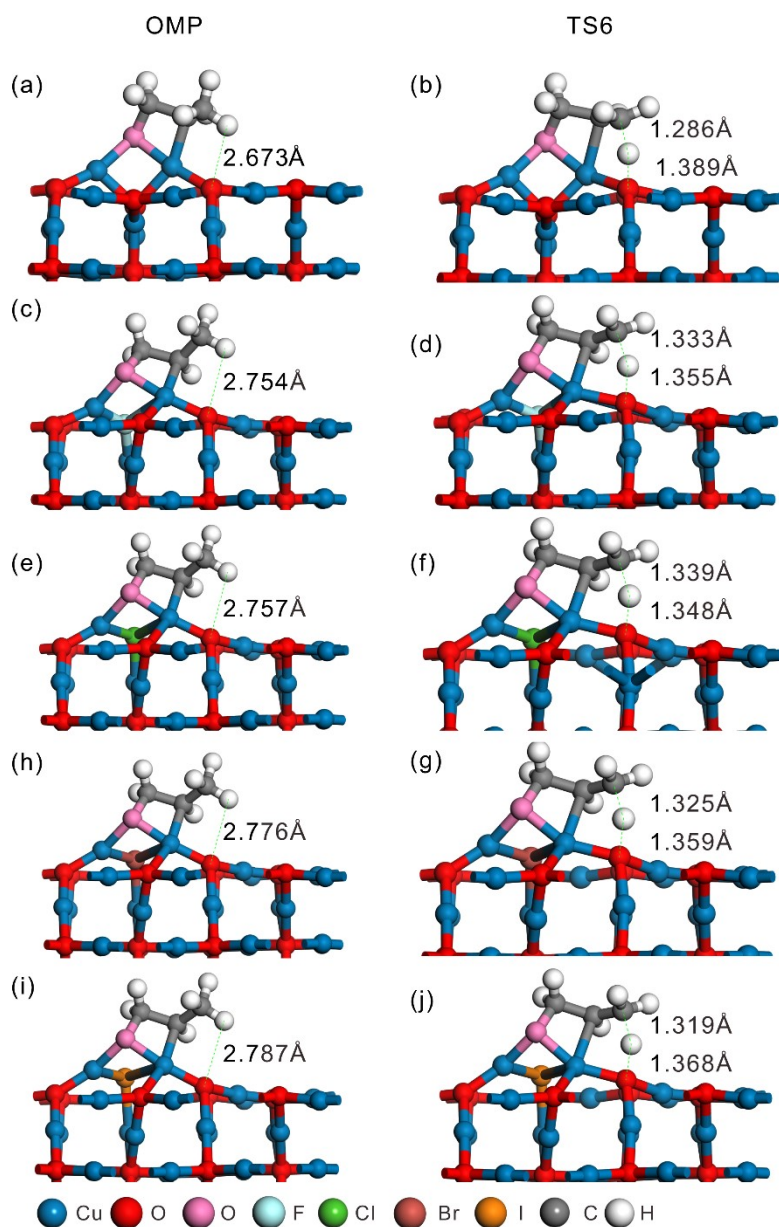

**Fig. S10.** The bond lengths involved in  $\alpha$ -H abstraction reaction: (a)-(b)  $\text{Cu}_2\text{O}(110)$ , (c)-(d)  $\text{F-Cu}_2\text{O}(110)$ , (e)-(f)  $\text{Cl-Cu}_2\text{O}(110)$ , (h)-(g)  $\text{Br-Cu}_2\text{O}(110)$  and (i)-(j)  $\text{I-Cu}_2\text{O}(110)$  surfaces.

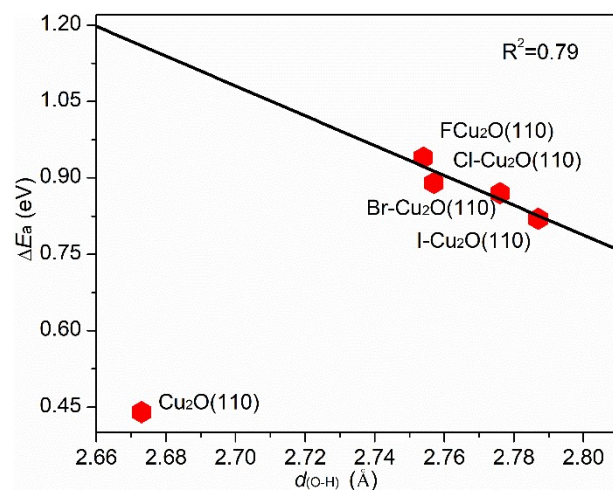

**Fig. S11.** The plot of  $d_{(OH)}$  versus  $\Delta E_a$  for  $\alpha$ -H abstraction.

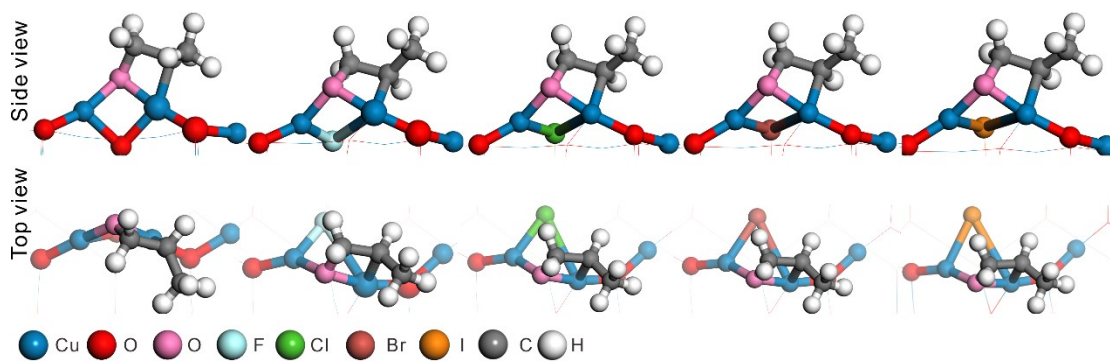

**Fig. S12.** The side view and top view of the OMP\* on Cu<sub>2</sub>O(110), F-Cu<sub>2</sub>O(110), Cl-Cu<sub>2</sub>O(110), Br-Cu<sub>2</sub>O(110) and I-Cu<sub>2</sub>O(110) surfaces.

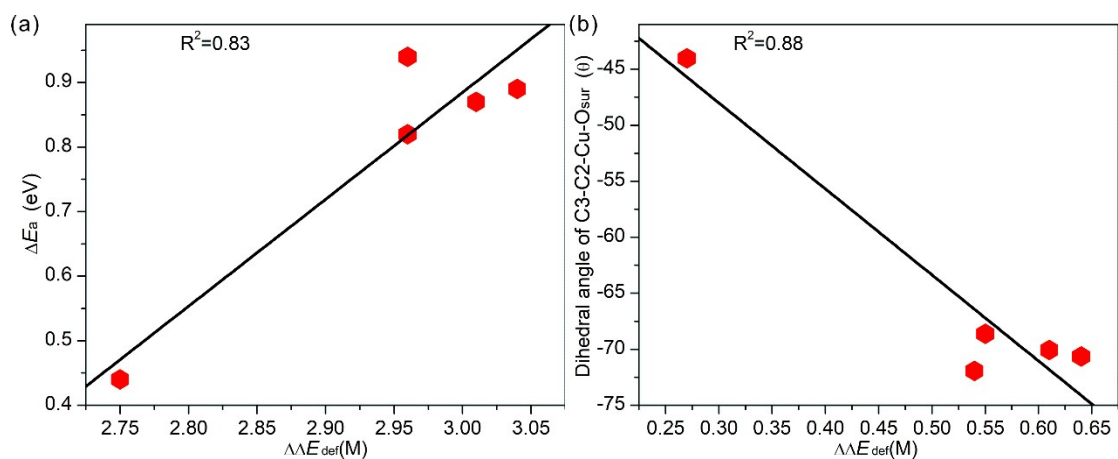

**Fig. S13.** (a) The linear relationship between  $\Delta\Delta E_{\text{def}}(\text{M})$  and  $\Delta E_a$  for  $\alpha$ -H abstraction. (b) The plot of  $\Delta\Delta E_{\text{def}}(\text{M})$  versus the dihedral angles  $D(\text{C3-C2-Cu-O}_{\text{sur}})$  of OMP\*.

**Table S1**

Summary of the adsorption energies ( $\Delta E_{\text{ad}}$ ), O-O bond lengths and Bader charges of  $\text{O}_2$  adsorption on  $\text{Cu}_2\text{O}(110)$  and halogen modified  $\text{Cu}_2\text{O}(110)$  surfaces.

| Surface                        | $\Delta E_{\text{ad}}$ (eV) | $d_{(\text{O}=\text{O})}$<br>(Å) | $d_{(\text{Cu}-\text{O})}$<br>(Å) | Bader Charge<br>( e ) |
|--------------------------------|-----------------------------|----------------------------------|-----------------------------------|-----------------------|
| $\text{Cu}_2\text{O}(110)$     | -0.57                       | 1.274                            | 2.123                             | -0.15                 |
|                                |                             |                                  | 2.105                             | -0.10                 |
| F- $\text{Cu}_2\text{O}(110)$  | -0.81                       | 1.319                            | 1.945                             | -0.20                 |
|                                |                             |                                  | 1.989                             | -0.18                 |
| Cl- $\text{Cu}_2\text{O}(110)$ | -0.68                       | 1.318                            | 1.944                             | -0.20                 |
|                                |                             |                                  | 2.003                             | -0.18                 |
| Br- $\text{Cu}_2\text{O}(110)$ | -0.68                       | 1.316                            | 1.946                             | -0.20                 |
|                                |                             |                                  | 2.014                             | -0.18                 |
| I- $\text{Cu}_2\text{O}(110)$  | -0.64                       | 1.316                            | 1.945                             | -0.21                 |
|                                |                             |                                  | 2.030                             | -0.18                 |

**Table S2**

Summary of the bond length  $d_{(\text{Cu-X})}$ , Bader Charge of Cu atoms directly coordinated with X in the top and sub layers of halogen modified  $\text{Cu}_2\text{O}(110)$  surface and the adsorption energy ( $\Delta E_{\text{ad}}$ ) of X on the vacancy site of the  $\text{Cu}_2\text{O}(110)$  surface.

| Surface                        | <sup>a</sup> $d_{(\text{Cu-X})}$<br>(Å) | <sup>b</sup> $d_{(\text{Cu-X})}$<br>(Å) | <sup>a</sup> Bader Charge<br>( e ) | <sup>b</sup> Bader Charge<br>( e ) | $\Delta E_{\text{ad}}$ (eV) |
|--------------------------------|-----------------------------------------|-----------------------------------------|------------------------------------|------------------------------------|-----------------------------|
| $\text{Cu}_2\text{O}(110)$     | 1.805                                   |                                         | +0.64                              |                                    |                             |
|                                | 1.805                                   | 1.807                                   | +0.64                              | +0.53                              | -5.96                       |
| F- $\text{Cu}_2\text{O}(110)$  | 1.928                                   |                                         | +0.57                              |                                    |                             |
|                                | 1.928                                   | 1.958                                   | +0.57                              | +0.51                              | -5.54                       |
| Cl- $\text{Cu}_2\text{O}(110)$ | 2.158                                   |                                         | +0.51                              |                                    |                             |
|                                | 2.158                                   | 2.193                                   | +0.51                              | +0.46                              | -4.28                       |
| Br- $\text{Cu}_2\text{O}(110)$ | 2.290                                   |                                         | +0.47                              |                                    |                             |
|                                | 2.290                                   | 2.331                                   | +0.47                              | +0.42                              | -3.91                       |
| I- $\text{Cu}_2\text{O}(110)$  | 2.446                                   |                                         | +0.41                              |                                    |                             |
|                                | 2.446                                   | 2.493                                   | +0.41                              | +0.37                              | -3.29                       |

<sup>a</sup>Cu atoms directly coordinate with X in the top layer, <sup>b</sup>Cu atoms directly coordinate with X in the sub layer.

**Table S3**

Summary of the reaction energies of each elementary step in DEP on pristine Cu<sub>2</sub>O(110) and halogen modified Cu<sub>2</sub>O(110) surfaces.

|      | Cu <sub>2</sub> O(110) | F-Cu <sub>2</sub> O(110) | Cl-Cu <sub>2</sub> O(110) | Br-Cu <sub>2</sub> O(110) | I-Cu <sub>2</sub> O(110) |
|------|------------------------|--------------------------|---------------------------|---------------------------|--------------------------|
| I    | -0.57                  | -0.81                    | -0.68                     | -0.68                     | -0.64                    |
| TS1  | 0.12(0.69)             | -0.34(0.47)              | -0.23(0.45)               | -0.21(0.47)               | -0.12(0.52)              |
| II   | -0.55                  | -0.58                    | -0.46                     | -0.46                     | -0.35                    |
| TS2  | 0.44(1.01)             | 0.06(0.87)               | 0.18(0.86)                | 0.19(0.87)                | 0.24(0.88)               |
| III  | 0.16                   | -0.17                    | 0.00                      | 0.00                      | 0.04                     |
| TS3  | -0.15(0.40)            | -0.33(0.25)              | -0.23(0.23)               | -0.22(0.24)               | -0.10(0.25)              |
| IV   | -1.92                  | -1.94                    | -1.64                     | -1.71                     | -1.78                    |
| V    | -2.68                  | -3.42                    | -3.02                     | -3.03                     | -2.96                    |
| TS4  | -1.53(0.39)            | -1.75(0.19)              | -1.40(0.24)               | -1.48(0.23)               | -1.54(0.24)              |
| VI   | -2.14                  | -2.51                    | -2.18                     | -2.26                     | -2.28                    |
| TS5  | -2.19(0.49)            | -2.74(0.68)              | -2.51(0.51)               | -2.49(0.54)               | -2.32(0.64)              |
| VII  | -3.55                  | -3.44                    | -3.33                     | -3.35                     | -3.32                    |
| TS6  | -2.24(0.44)            | -2.48(0.94)              | -2.13(0.89)               | -2.16(0.87)               | -2.14(0.82)              |
| VIII | -3.54                  | -3.89                    | -3.81                     | -3.65                     | -3.54                    |

**Table S4**

Decomposition of the energies of OMP\* on pristine Cu<sub>2</sub>O(110) and halogen modified Cu<sub>2</sub>O(110) surfaces.

|                                   | Cu <sub>2</sub> O(110) | F-Cu <sub>2</sub> O(110) | Cl-Cu <sub>2</sub> O(110) | Br-Cu <sub>2</sub> O(110) | I-Cu <sub>2</sub> O(110) |
|-----------------------------------|------------------------|--------------------------|---------------------------|---------------------------|--------------------------|
| $\Delta E_{\text{def}}(\text{M})$ | 2.48                   | 2.41                     | 2.40                      | 2.40                      | 2.42                     |
| $\Delta E_{\text{def}}(\text{S})$ | 1.95                   | 1.41                     | 1.54                      | 1.54                      | 1.59                     |
| $\Delta E_{\text{int}}$           | -7.11                  | -7.25                    | -6.96                     | -6.96                     | -6.97                    |
| $\Delta E$                        | -2.68                  | -3.42                    | -3.02                     | -3.03                     | -2.96                    |

**Table S5**

Decomposition of the energies of TS6 on pristine Cu<sub>2</sub>O(110) and halogen modified Cu<sub>2</sub>O(110) surfaces.

|                                   | Cu <sub>2</sub> O(110) | F-Cu <sub>2</sub> O(110) | Cl-Cu <sub>2</sub> O(110) | Br-Cu <sub>2</sub> O(110) | I-Cu <sub>2</sub> O(110) |
|-----------------------------------|------------------------|--------------------------|---------------------------|---------------------------|--------------------------|
| $\Delta E_{\text{def}}(\text{M})$ | 2.75                   | 2.96                     | 3.04                      | 3.01                      | 2.96                     |
| $\Delta E_{\text{def}}(\text{S})$ | 1.89                   | 1.42                     | 1.57                      | 1.54                      | 1.5                      |
| $\Delta E_{\text{int}}$           | -6.88                  | -6.87                    | -6.78                     | -6.71                     | -6.6                     |
| $\Delta E$                        | -2.24                  | -2.48                    | -2.17                     | -2.16                     | -2.14                    |

**Table S6**

The energy difference between TS6 and OMP\* on pristine Cu<sub>2</sub>O(110) and halogen modified Cu<sub>2</sub>O(110) surfaces.

|                                         | Cu <sub>2</sub> O(110) | F-Cu <sub>2</sub> O(110) | Cl-Cu <sub>2</sub> O(110) | Br-Cu <sub>2</sub> O(110) | I-Cu <sub>2</sub> O(110) |
|-----------------------------------------|------------------------|--------------------------|---------------------------|---------------------------|--------------------------|
| $\Delta\Delta E_{\text{def}}(\text{M})$ | 0.27                   | 0.54                     | 0.64                      | 0.61                      | 0.55                     |
| $\Delta\Delta E_{\text{def}}(\text{S})$ | -0.06                  | 0.01                     | 0.06                      | 0.00                      | -0.09                    |
| $\Delta\Delta E_{\text{int}}$           | 0.23                   | 0.39                     | 0.18                      | 0.26                      | 0.37                     |
| $\Delta E_a$                            | 0.44                   | 0.94                     | 0.89                      | 0.87                      | 0.82                     |
